# Supplementary material for: Precision, Applicability, and Economic Implications: A Comparison of Alternative Biodiversity Offset Indexes
Source: Environ Manage. 2021 Jun 7;68(2):170–83. doi: 10.1007/s00267-021-01488-5 (PMC8241746; doi:10.1007/s00267-021-01488-5)
Supplement: Supplementary file 1 — Online Resource 1 [file 267_2021_1488_MOESM1_ESM.xlsx]

## Sheet: Analysis
	Online Resource 1: Data and calculations
	THE MAIN ANALYSIS
	MULTIPLICATIVE METHOD
								BIODIVERSITY COMPONENTS, WEIGHTS AND REFERENCE VALUES FOR THE MULTIPLICATIVE METHOD
		DEVELOPMENT SITE	COMPENSATION SITE					Component	Weight	Ref. values
		CURRENT STATE	CURRENT STATE	CONSERVATION	DEAD WOOD CREATION	BURNING		Deacying wood, stage 1	0.171965	26
	Deacying wood, stage 1	14.1	3	6.57	6.57	26		Deacying wood, stage 2	0.171965	26
	Deacying wood, stage 2	10.9	2.6	6.285	26.285	26		Deacying wood, stage 3	0.171965	26
	Deacying wood, stage 3	11.2	1.3	7.885	26	26		Broad-leaved trees	0.283375	50
	Broad-leaved trees	49	9	9	14	24		Large trees	0.283375	20
	Large trees	18	10	10	10	10
	STATE	0.608697	0.146068	0.208821	0.43046	0.621472
	ADDITIVE METHOD
								BIODIVERSITY COMPONENTS AND MAXIMUM SCORES FOR THE ADDITIVE METHOD					SCORING INTERVALS TO DETERMINE A SCORE FOR EACH COMPONENT
		DEVELOPMENT SITE	COMPENSATION SITE					Component	Maximum score				Deacying wood, stage 1	Value for the component, m3 per ha	Score	Deacying wood, stage 2	Value for the component, m3 per ha	Score	Deacying wood, stage 3	Value for the component, m3 per ha	Score	Broad-leaved trees	Value for the component, m3 per ha	Score	Large trees	Value for the component, pcs per ha	Score
		CURRENT STATE	CURRENT STATE	CONSERVATION	DEAD WOOD CREATION	BURNING		Deacying wood, stage 1	15.8838				None	0	0	None	0	0	None	0	0	None	0	0	None	0	0
	Deacying wood, stage 1	3.97095	3.97095	3.97095	3.97095	15.8838		Deacying wood, stage 2	15.8838				0-30 %	0.1-7.8	3.97095	0-30 %	0.1-7.8	3.97095	0-30 %	0.1-7.8	3.97095	0-30 %	1-15	6.54358	0-30 %	1-6	6.54358
	Deacying wood, stage 2	7.94189	3.97095	3.97095	15.8838	15.8838		Deacying wood, stage 3	15.8838				30-60 %	7.9-15.6	7.94189	30-60 %	7.9-15.6	7.94189	30-60 %	7.9-15.6	7.94189	30-60 %	16-30	13.0872	30-60 %	7-12	13.0872
	Deacying wood, stage 3	7.94189	3.97095	7.94189	15.8838	15.8838		Broad-leaved trees	26.1743				60-90 %	15.7-23.4	11.9128	60-90 %	15.7-23.4	11.9128	60-90 %	15.7-23.4	11.9128	60-90 %	31-45	19.6307	60-90 %	13-18	19.6307
	Broad-leaved trees	26.1743	6.54358	6.54358	6.54358	13.0872		Large trees	26.1743				> 90 %	23.5-	15.8838	> 90 %	23.5-	15.8838	> 90 %	23.5-	15.8838	> 90 %	46-	26.1743	> 90 %	19-	26.1743
	Large trees	19.6307	13.0872	13.0872	13.0872	13.0872		TOTAL	100
	STATE	0.656598	0.315436	0.355145	0.553693	0.738257
	MATRIX METHOD
								SCORING MATRIX FOR THE MATRIX METHOD
		DEVELOPMENT SITE	COMPENSATION SITE						DISTINCTIVENESS				CONDITION SCORES FOR THE MATRIX METHOD				DISTINCTIVENESS SCORES FOR THE MATRIX METHOD
		CURRENT STATE	CURRENT STATE	CONSERVATION	DEAD WOOD CREATION	BURNING		CONDITION	Low 2	Medium 4	High 6		Habitat condition	ELITE index value	Score		Category	Score	Example
	Condition score	2	1	1	2	2		0	0	0	0		0	0	0		Low	2	Agricultural land in intensive use, parks
	Distinctiveness score	4	4	4	4	4		Poor 1	2	4	6		Poor	0.01-0.33	1		Medium	4	Pine mires, fens, and herb-rich, mesic, sub-xeric and xeric heath forests
	Result	8	4	4	8	8		Moderate 2	4	8	12		Moderate	0.34-0.66	2		High	6	Spruce mires, semi-natural dry, mesic and moist grasslands, herb-rich forests,
	Scaled	0.444444	0.222222	0.222222	0.444444	0.444444		Good 3	6	12	18		Good	0.67-1	3				barren heath forests, wooded pastures
	SUMMARY OF RESULTS
								COSTS
	CURRENT STATE	DEVELOPMENT SITE	COMPENSATION SITE					Conservation	Dead wood creation	Burning
	MULTIPLICATIVE	0.608697	0.146068					2947	3447.2	4447.2
	ADDITIVE	0.656598	0.315436
	MATRIX	0.444444	0.222222					DISCOUNTING
								%	t
								0.035	30
	SCENARIOS
	CONSERVATION	State	Gain	Trade ratio	Costs	Multipliers for time delay	All multipliers
	MULTIPLICATIVE	0.208821	0.0627536	9.6998	28585.3	27.2253	27.2253
	ADDITIVE	0.355145	0.0397095	16.5351	48728.8		24.8026
	MATRIX	0.222222	0	-	-	-	-
	DEAD WOOD CREATION
	MULTIPLICATIVE	0.43046	0.284392	2.14034	7378.19	6.0075	6.0075
	ADDITIVE	0.553693	0.238257	2.75584	9499.94		4.13376
	MATRIX	0.444444	0.222222	2	6894.4	5.8309	8.70284
	BURNING
	MULTIPLICATIVE	0.621472	0.475404	1.28038	5694.1	3.59376	3.59376
	ADDITIVE	0.738257	0.422821	1.5529	6906.05		2.32935
	MATRIX	0.444444	0.222222	2	8894.4	5.8309	8.70284
	SUBSTITUTABILITY ANALYSIS FOR MULTIPLICATIVE AND ADDITIVE METHODS
	MULTIPLICATIVE METHOD
		COMPONENT COMPLETELY DEGRADED		COMPONENT RESTORED TO REFERENCE STATE
	Deacying wood, stage 1	0	26	26	0
	Deacying wood, stage 2	26	26	0	0
	Deacying wood, stage 3	26	26	0	0
	Broad-leaved trees	50	0	0	50
	Large trees	20	20	0	0
	STATE	0.757262	0.600001	0.0854711	0.162741
	ADDITIVE METHOD
		COMPONENT COMPLETELY DEGRADED		COMPONENT RESTORED TO REFERENCE STATE
	Deacying wood, stage 1	0	15.8838	15.88	0
	Deacying wood, stage 2	15.8838	15.8838	0	0
	Deacying wood, stage 3	15.8838	15.8838	0	0
	Broad-leaved trees	26.1743	0	0	26.17
	Large trees	26.1743	26.1743	0	0
	STATE	0.841162	0.738257	0.1588	0.2617
	SENSITIVITY ANALYSIS FOR DEAD WOOD WEIGHTS
	MULTIPLICATIVE METHOD
		DEVELOPMENT SITE	COMPENSATION SITE					Component	Weight	Ref. values
		CURRENT STATE	CURRENT STATE	CONSERVATION	DEAD WOOD CREATION	BURNING		Deacying wood, stage 1	0.065	26
	Deacying wood, stage 1	14.1	3	6.57	6.57	26		Deacying wood, stage 2	0.065	26
	Deacying wood, stage 2	10.9	2.6	6.285	26.285	26		Deacying wood, stage 3	0.065	26
	Deacying wood, stage 3	11.2	1.3	7.885	26	26		Broad-leaved trees	0.185	50
	Broad-leaved trees	49	9	9	14	24		Large trees	0.185	20
	Large trees	18	10	10	10	10
	STATE	0.735662	0.214414	0.266626	0.450718	0.606615
	ADDITIVE METHOD
								BIODIVERSITY COMPONENTS, WEIGHTS AND REFERENCE VALUES					SCORING INTERVALS
		DEVELOPMENT SITE	COMPENSATION SITE					Component	Maximum score				Deacying wood, stage 1	Value	Score	Deacying wood, stage 2	Value	Score	Deacying wood, stage 3	Value	Score	Broad-leaved trees	Value	Score	Large trees	Value	Score
		CURRENT STATE	CURRENT STATE	CONSERVATION	DEAD WOOD CREATION	BURNING		Deacying wood, stage 1	13.0435				None	0	0	None	0	0	None	0	0	None	0	0	None	0	0
	Deacying wood, stage 1	5.75221	2.87611	2.87611	2.87611	11.5044		Deacying wood, stage 2	13.0435				0-30 %	0,1-7,8	3.26087	0-30 %	0,1-7,8	3.26087	0-30 %	0,1-7,8	3.26087	0-30 %	15	7.6087	0-30 %	6	7.6087
	Deacying wood, stage 2	5.75221	2.87611	2.87611	11.5044	11.5044		Deacying wood, stage 3	13.0435				30-60 %	7,9-15,6	6.52174	30-60 %	7,9-15,6	6.52174	30-60 %	7,9-15,6	6.52174	30-60 %	30	15.2174	30-60 %	12	15.2174
	Deacying wood, stage 3	2.87611	2.87611	5.75221	11.5044	11.5044		Broad-leaved trees	30.4348				60-90 %	15,7-23,4	9.78261	60-90 %	15,7-23,4	9.78261	60-90 %	15,7-23,4	9.78261	60-90 %	45	22.8261	60-90 %	18	22.8261
	Broad-leaved trees	32.7434	8.18584	8.18584	8.18584	16.3717		Large trees	30.4348				> 90 %	23,5-	13.0435	> 90 %	23,5-	13.0435	> 90 %	23,5-	13.0435	> 90 %	> 45	30.4348	> 90 %	> 18	30.4348
	Large trees	24.5575	16.3717	16.3717	16.3717	16.3717
	STATE	0.716814	0.331858	0.360619	0.504425	0.672566
	MATRIX METHOD
		DEVELOPMENT SITE	COMPENSATION SITE
		CURRENT STATE	CURRENT STATE	CONSERVATION	DEAD WOOD CREATION	BURNING
	Condition score	3	1	1	2	2
	Distinctiveness score	4	4	4	4	4
	Result	12	4	4	8	8
	Scaled	0.666667	0.222222	0.222222	0.444444	0.444444
	SUMMARY OF RESULTS
	CURRENT STATE	DEVELOPMENT SITE	COMPENSATION SITE
	MULTIPLICATIVE	0.735662	0.214414
	ADDITIVE	0.716814	0.331858
	MATRIX	0.666667	0.222222
	SCENARIOS
	CONSERVATION	State	Gain	Trade ratio	Costs
	MULTIPLICATIVE	0.266626	0.0522111	14.0901	41523.6
	ADDITIVE	0.360619	0.0287611	24.9231	73448.3
	MATRIX	0.222222	0	-	-
	DEAD WOOD CREATION
	MULTIPLICATIVE	0.450718	0.236304	3.1132	10731.8
	ADDITIVE	0.504425	0.172566	4.15385	14319.1
	MATRIX	0.444444	0.222222	3	10341.6
	BURNING
	MULTIPLICATIVE	0.606615	0.3922	1.87573	8341.74
	ADDITIVE	0.672566	0.340708	2.1039	9356.45
	MATRIX	0.444444	0.222222	3	13341.6
	SENSITIVITY ANALYSIS FOR RESTORATION UNCERTAINTY
	MULTIPLICATIVE METHOD
		DEVELOPMENT SITE	COMPENSATION SITE
				MIN			MAX
		CURRENT STATE	CURRENT STATE	CONSERVATION	DEAD WOOD CREATION	BURNING	CONSERVATION	DEAD WOOD CREATION	BURNING
	Deacying wood, stage 1	14.1	3	3.942	3.942	15.6	9.198	9.198	26
	Deacying wood, stage 2	10.9	2.6	3.771	15.771	15.6	8.799	26	26
	Deacying wood, stage 3	11.2	1.3	4.731	15.6	15.6	11.039	26	26
	Broad-leaved trees	49	9	5.4	8.4	14.4	12.6	19.6	33.6
	Large trees	18	10	10	10	10	10	10	10
	STATE	0.608697	0.146068	0.155212	0.27505	0.369396	0.266122	0.479817	0.68739
	ADDITIVE METHOD
		DEVELOPMENT SITE	COMPENSATION SITE
				MIN			MAX
		CURRENT STATE	CURRENT STATE	CONSERVATION	DEAD WOOD CREATION	BURNING	CONSERVATION	DEAD WOOD CREATION	BURNING
	Deacying wood, stage 1	3.97095	3.97095	3.97095	3.97095	7.94189	7.94189	7.94189	15.8838
	Deacying wood, stage 2	7.94189	3.97095	3.97095	11.9128	7.94189	7.94189	15.8838	15.8838
	Deacying wood, stage 3	7.94189	3.97095	3.97095	7.94189	7.94189	7.94189	15.8838	15.8838
	Broad-leaved trees	26.1743	6.54358	6.54358	6.54358	6.54358	6.54358	13.0872	19.6307
	Large trees	19.6307	13.0872	13.0872	13.0872	13.0872	13.0872	13.0872	13.0872
	STATE	0.656598	0.315436	0.315436	0.434564	0.434564	0.434564	0.658838	0.803693
	MATRIX METHOD
		DEVELOPMENT SITE	COMPENSATION SITE
				MIN			MAX
		CURRENT STATE	CURRENT STATE	CONSERVATION	DEAD WOOD CREATION	BURNING	CONSERVATION	DEAD WOOD CREATION	BURNING
	Condition score	2	1	1	1	2	1	2	3
	Distinctiveness score	4	4	4	4	4	4	4	4
	Result	8	4	4	4	8	4	8	12
	Scaled	0.444444	0.222222	0.222222	0.222222	0.444444	0.222222	0.444444	0.666667
	SUMMARY OF RESULTS
	CURRENT STATE	DEVELOPMENT SITE	COMPENSATION SITE
	MULTIPLICATIVE	0.608697	0.146068
	ADDITIVE	0.656598	0.315436
	MATRIX	0.444444	0.222222
	SCENARIOS
		MIN				MAX
	CONSERVATION	State	Gain	Trade ratio	Costs	State	Gain	Trade ratio	Costs
	MULTIPLICATIVE	0.155212	0.00914487	66.5616	196157	0.266122	0.120054	5.07017	14941.8
	ADDITIVE	0.315436	0	-	-	0.434564	0.119128	5.51168	16242.9
	MATRIX	0.222222	0	-	-	0.222222	0	-	-
	DEAD WOOD CREATION
	MULTIPLICATIVE	0.27505	0.128983	4.71921	16268.1	0.479817	0.33375	1.82381	6287.05
	ADDITIVE	0.434564	0.119128	5.51168	18999.9	0.658838	0.343402	1.91204	6591.18
	MATRIX	0.222222	0	-	-	0.444444	0.222222	2	6894.4
	BURNING
	MULTIPLICATIVE	0.369396	0.223328	2.72557	12121.2	0.68739	0.541322	1.12446	5000.71
	ADDITIVE	0.434564	0.119128	5.51168	24511.6	0.803693	0.488257	1.34478	5980.51
	MATRIX	0.444444	0.222222	2	8894.4	0.666667	0.444444	1	4447.2
	SENSITIVITY ANALYSIS FOR BASELINE UNCERTAINTY
	MULTIPLICATIVE METHOD
		DEVELOPMENT SITE	COMPENSATION SITE
		CURRENT STATE	CURRENT STATE	BAU STATE+*	BAU STATE-**	CONSERVATION	DEAD WOOD CREATION	BURNING
	Deacying wood, stage 1	14.1	3	4.2	1.8	6.57	6.57	26
	Deacying wood, stage 2	10.9	2.6	3.64	1.56	6.285	26.285	26
	Deacying wood, stage 3	11.2	1.3	1.82	0.78	7.885	26	26
	Broad-leaved trees	49	9	12.6	5.4	9	14	24
	Large trees	18	10	10	10	10	10	10
	STATE	0.608697	0.146068	0.173344	0.119597	0.208821	0.43046	0.621472
				*business as usual leads to 40 % increase in the components
					**business as usual leads to 40 % decrease in the components
	ADDITIVE METHOD
		DEVELOPMENT SITE	COMPENSATION SITE
		CURRENT STATE	CURRENT STATE	BAU STATE+	BAU STATE-	CONSERVATION	DEAD WOOD CREATION	BURNING
	Deacying wood, stage 1	3.97095	3.97095	3.97095	3.97095	3.97095	3.97095	15.8838
	Deacying wood, stage 2	7.94189	3.97095	3.97095	3.97095	3.97095	15.8838	15.8838
	Deacying wood, stage 3	7.94189	3.97095	3.97095	3.97095	7.94189	15.8838	15.8838
	Broad-leaved trees	26.1743	6.54358	6.54358	6.54358	6.54358	6.54358	13.0872
	Large trees	19.6307	13.0872	13.0872	13.0872	13.0872	13.0872	13.0872
	STATE	0.656598	0.315436	0.315436	0.315436	0.355145	0.553693	0.738257
	MATRIX METHOD
		DEVELOPMENT SITE	COMPENSATION SITE
		CURRENT STATE	CURRENT STATE	BAU STATE+	BAU STATE-	CONSERVATION	DEAD WOOD CREATION	BURNING
	Condition score	2	1	1	1	1	2	2
	Distinctiveness score	4	4	4	4	4	4	4
	Result	8	4	4	4	4	8	8
	Scaled	0.444444	0.222222	0.222222	0.222222	0.222222	0.444444	0.444444
	SUMMARY OF RESULTS
	CURRENT STATE	DEVELOPMENT SITE	BAU STATE+	BAU STATE-
	MULTIPLICATIVE	0.608697	0.173344	0.119597
	ADDITIVE	0.656598	0.315436	0.315436
	MATRIX	0.444444	0.222222	0.222222
	SCENARIOS
			BAU STATE+			BAU STATE-
	CONSERVATION	State	Gain	Trade ratio	Costs	Gain	Trade ratio	Costs
	MULTIPLICATIVE	0.208821	0.0354771	17.1575	50563.1	0.0892243	6.8221	20104.7
	ADDITIVE	0.355145	0.0397095	16.5351	48728.8	0.0397095	16.5351	48728.8
	MATRIX	0.222222	0	-	-	0	-	-
	DEAD WOOD CREATION
	MULTIPLICATIVE	0.43046	0.257116	2.3674	8160.91	0.310863	1.95809	6749.92
	ADDITIVE	0.553693	0.238257	2.75584	9499.94	0.238257	2.75584	9499.94
	MATRIX	0.444444	0.222222	2	6894.4	0.222222	2	6894.4
	BURNING
	MULTIPLICATIVE	0.621472	0.448128	1.35831	6040.69	0.501875	1.21285	5393.77
	ADDITIVE	0.738257	0.422821	1.5529	6906.05	0.422821	1.5529	6906.05
	MATRIX	0.444444	0.222222	2	8894.4	0.222222	2	8894.4
